# Supplementary material for: Liquid PTVA: a faster and cheaper alternative for generating multi-copy clones in Pichia pastoris
Source: PubMed Central journal article supplement (PMC4744420; doi:10.1186/s12934-016-0432-8), 2016-02-05

A

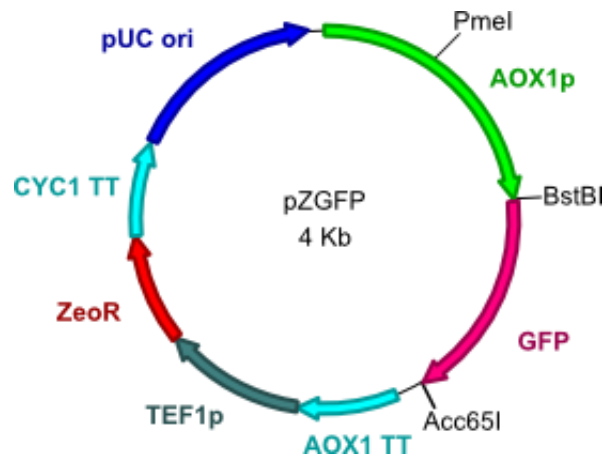

B

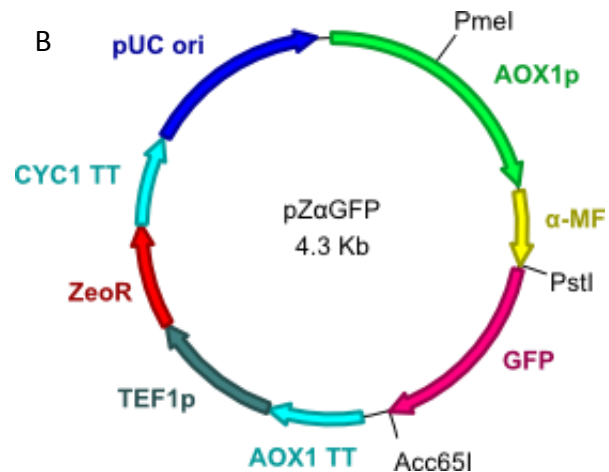

C

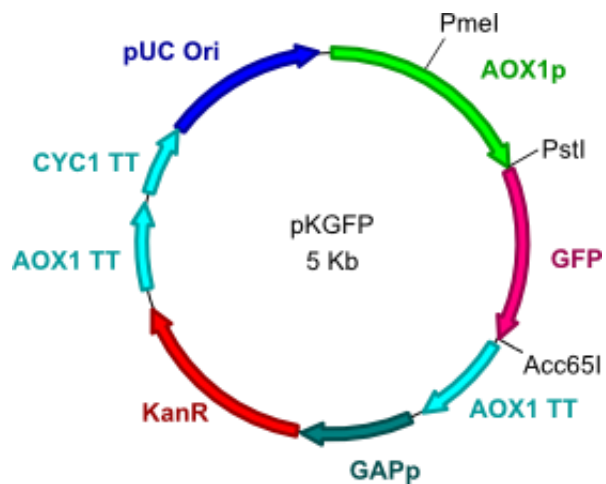

D

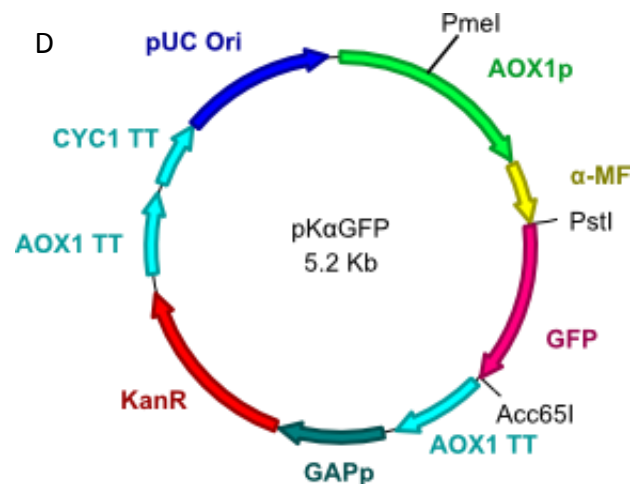

Supplement: 12934_2016_432_MOESM1_ESM.pdf [file 12934_2016_432_MOESM1_ESM.pdf]
