# Supplementary material for: Liquid PTVA: a faster and cheaper alternative for generating multi-copy clones in Pichia pastoris
Source: Microb Cell Fact. 2016 Feb 5;15:29. doi: 10.1186/s12934-016-0432-8 (PMC4744420; doi:10.1186/s12934-016-0432-8)
Supplement: Supplementary file 4 — 10.1186/s12934-016-0432-8 DNA Sequence of codon optimized superfolded GFP (sGFP). [file 12934_2016_432_MOESM4_ESM.pdf]

. . . . .  
 ATGAGCAAAGGCGAAGAACTGTTTACCGGCGTGGTGCCGATTCTGGTGGAACTGGATGGCGATGTGAACGGCCATAAATTTAGCGTGCGCGGCGAAGGCG  
 110 120 130 140 150 160 170 180 190 200  
 . . . . .  
 AAGGCGATGCGACCAACGGCAAAC TGACCCTGAAATTTATTTGCACCACCGGCAAAC TGCCGGTGCCGTGGCCGACCCTGGTGACCACCC TGACCTATGG  
 210 220 230 240 250 260 270 280 290 300  
 . . . . .  
 CGTGCAGTGCTTTAGCCGCTATCCGGATCACATGAAACGCCATGATTTTTTTTAAAGCGCGATGCCGGAAGGCTATGTGTCAGGAACGCACCATTAGCTTT  
 310 320 330 340 350 360 370 380 390 400  
 . . . . .  
 AAAGATGATGGCACCTATAAAACCCGCGCGGAAGTGAAATTTGAAGGCGATACCCCTGGTGAAACCGCATTGAAC TGAAGGCATTGATTTTAAAGAAGATG  
 410 420 430 440 450 460 470 480 490 500  
 . . . . .  
 GCAACATTCTGGGCCATAAACTGGAATATAACTTTAACAGCCATAACGTGTATATTACCGCGGATAAACAGAAAAACGGCATTAAAGCGAAC TTTAAAT  
 510 520 530 540 550 560 570 580 590 600  
 . . . . .  
 TCGCCATAACGTGGAAGATGGCAGCGTGCAGCTGGCGGATCATTATCAGCAGAACACCCCGATTGGCGATGGCCCCGTGCTGCTGCCGGATAACCATTAT  
 610 620 630 640 650 660 670 680 690 700  
 . . . . .  
 CTGAGCACCCAGAGCGTGTCTGAGCAAAGATCCGAACGAAAAACGCGATCACATGGTGTCTGCTGGAATTTGTGACCGCGGCGGGGCATTACCCATGGCATGG  
 710  
 . . . . .  
 ATGAACTGTATAAATAA
